# Supplementary material
Source: PubMed Central journal article supplement (PMC9135048)
Supplement: NIHMS1802222-supplement-Online_Tables_1-3.pdf [file NIHMS1802222-supplement-Online_Tables_1-3.pdf]

**Online Table 1. Patient Characteristics**

|                                  | <b>All Patients (N=67,161)</b> |
|----------------------------------|--------------------------------|
| Age                              | 74.51 (13.7)                   |
| Sex                              |                                |
| Female                           | 25,189 (49.7%)                 |
| Male                             | 25,548 (50.4%)                 |
| Index year                       |                                |
| 2011                             | 18,286 (36.0%)                 |
| 2012                             | 17,693 (34.9%)                 |
| 2013                             | 14,758 (29.1%)                 |
| Heart failure type               |                                |
| With preserved ejection fraction | 16,422 (32.4%)                 |
| With reduced ejection fraction   | 17,089 (33.7%)                 |
| Mixed/unspecified                | 17,226 (34.0%)                 |
| Cardiovascular characteristics   |                                |
| Coronary artery disease          | 23,026 (45.4%)                 |
| Hypertension                     | 41,336 (81.5%)                 |
| Hyperlipidemia                   | 21,760 (42.9%)                 |

|                                       |                |
|---------------------------------------|----------------|
| Diabetes                              | 22,391 (44.1%) |
| Smoking                               | 4,986 (9.8%)   |
| Prior stroke                          | 4,999 (9.9%)   |
| Peripheral arterial disease           | 10,342 (20.4%) |
| Major arrhythmia                      | 5,421 (10.7%)  |
| Non-major arrhythmia                  | 29,130 (57.4%) |
| Comorbid conditions                   |                |
| Renal disease                         | 24,122 (47.5%) |
| Chronic obstructive pulmonary disease | 20,810 (41.0%) |
| Malignancy                            | 9,205 (18.1%)  |
| Dementia                              | 3,199 (6.3%)   |

---

**Online Table 2. Ischemic CAD Testing and Revascularization**

|                                                                  | <b>No CAD<br/>(n=27,711)</b> | <b>CAD<br/>(n=23,062)</b> | <b>All Patients<br/>(N=50,737)</b> | <b>p-value</b> |
|------------------------------------------------------------------|------------------------------|---------------------------|------------------------------------|----------------|
| <b>Non-invasive assessment for ischemia</b>                      |                              |                           |                                    |                |
| During index hospitalization                                     | 2,351 (8.5%)                 | 2,170 (9.4%)              | 4,521 (8.9%)                       | 0.0002         |
| Within 90 days post-index                                        | 4,293 (15.5%)                | 3,706 (16.1%)             | 7,999 (15.8%)                      | 0.06           |
| <b>Invasive assessment for ischemia</b>                          |                              |                           |                                    |                |
| During index hospitalization                                     | 2,696 (9.7%)                 | 3,125 (13.6%)             | 5,821 (11.5%)                      | <0.0001        |
| Within 90 days post-index                                        | 4,288 (15.5%)                | 4,235 (18.4%)             | 8,523 (16.8%)                      | <0.0001        |
| <b>Invasive or non-invasive assessment for ischemia</b>          |                              |                           |                                    |                |
| During index hospitalization                                     | 4,743 (17.1%)                | 4,739 (20.6%)             | 9,482 (18.7%)                      | <0.0001        |
| Within 90 days post-index                                        | 7,659 (27.6%)                | 6,852 (29.8%)             | 14,511 (28.6%)                     | <0.0001        |
| <b>Neither invasive nor non-invasive assessment for ischemia</b> |                              |                           |                                    |                |

|                                                     |                |                |                |         |
|-----------------------------------------------------|----------------|----------------|----------------|---------|
| During index hospitalization                        | 22,968 (82.9%) | 18,287 (79.4%) | 41,255 (81.3%) | <0.0001 |
| Within 90 days post-index                           | 20,052 (72.4%) | 16,174 (70.2%) | 36,226 (71.4%) | <0.0001 |
| With revascularization during index hospitalization | 129 (0.5%)     | 851 (3.7%)     | 980 (1.9%)     | <0.0001 |
| Percutaneous coronary intervention only             | 102 (0.4%)     | 606 (2.6%)     | 708 (1.4%)     |         |
| Coronary artery bypass grafting only                | 27 (0.1%)      | 237 (1.0%)     | 264 (0.5%)     |         |
| Hybrid revascularization                            | 0 (0.0%)       | 8 (0.0%)       | 8 (0.0%)       |         |
| With revascularization within 90 days post-index    | 572 (2.1%)     | 1,486 (6.5%)   | 2,058 (4.1%)   | <0.0001 |
| Percutaneous coronary intervention only             | 363 (1.3%)     | 1,000 (4.3%)   | 1,363 (2.7%)   |         |
| Coronary artery bypass grafting only                | 206 (0.7%)     | 466 (2.0%)     | 672 (1.3%)     |         |
| Hybrid revascularization                            | 3 (0.0%)       | 20 (0.1%)      | 23 (0.1%)      |         |

**Online Table 3. Supplemental Multivariable Analyses**

|                             | Non-invasive Testing |               | Adjusted Odds Ratio       |         | Invasive Testing |               | Adjusted Odds Ratio       |         |
|-----------------------------|----------------------|---------------|---------------------------|---------|------------------|---------------|---------------------------|---------|
|                             | No (n=61,838)        | Yes (n=5,323) | (95% Confidence Interval) | p Value | No (n=59,735)    | Yes (n=7,426) | (95% Confidence Interval) | p Value |
| Age group                   |                      |               |                           |         |                  |               |                           |         |
| 18-70                       | 15,750 (34.1%)       | 2,176 (48.1%) | Reference group           |         | 14,108 (31.4%)   | 3,818 (65.6%) | Reference group           |         |
| 71-85                       | 18,102 (39.2%)       | 1,854 (41.0%) | 0.82 (0.763-0.877)        | <0.0001 | 18,201 (40.5%)   | 1,755 (30.2%) | 0.40 (0.374-0.428)        | <0.0001 |
| 85+                         | 12,364 (26.8%)       | 491 (10.9%)   | 0.33 (0.296-0.367)        | <0.0001 | 12,607 (28.1%)   | 248 (4.3%)    | 0.08 (0.073-0.096)        | <0.0001 |
| Sex                         |                      |               |                           |         |                  |               |                           |         |
| Female                      | 23,153 (50.1%)       | 2,036 (45.0%) | Reference group           |         | 22,853 (50.9%)   | 2,336 (40.1%) | Reference group           |         |
| Male                        | 23,063 (49.9%)       | 2,485 (55.0%) | 1.07 (1.006-1.145)        | 0.03    | 22,063 (49.1%)   | 3,485 (59.9%) | 1.04 (0.981-1.109)        | 0.18    |
| Index year                  |                      |               |                           |         |                  |               |                           |         |
| 2011                        | 16,666 (36.1%)       | 1,620 (35.8%) | Reference group           |         | 16,298 (36.3%)   | 1,988 (34.2%) | Reference group           |         |
| 2012                        | 16,093 (34.8%)       | 1,600 (35.4%) | 1.02 (0.952-1.103)        | 0.51    | 15,655 (34.9%)   | 2,038 (35.0%) | 1.08 (1.006-1.157)        | 0.03    |
| 2013                        | 13,457 (29.1%)       | 1,301 (28.8%) | 1.00 (0.929-1.085)        | 0.92    | 12,963 (28.9%)   | 1,795 (30.8%) | 1.21 (1.125-1.301)        | <0.0001 |
| Heart failure type          |                      |               |                           |         |                  |               |                           |         |
| Preserved ejection fraction | 15,005 (32.5%)       | 1,417 (31.3%) | Reference group           |         | 15,532 (34.6%)   | 890 (15.3%)   | Reference group           |         |
| Reduced ejection fraction   | 15,378 (33.3%)       | 1,711 (37.9%) | 1.37 (1.259-1.484)        | <0.0001 | 14,006 (31.2%)   | 3,083 (53.0%) | 1.92 (1.782-2.066)        | <0.0001 |
| Mixed/unspecified           | 15,833 (34.3%)       | 1,393 (30.8%) | 1.32 (1.211-1.446)        | <0.0001 | 15,378 (34.2%)   | 1,848 (31.8%) | 0.71 (0.642-0.775)        | <0.0001 |

Cardiovascular characteristics

|                             |                |               |                    |         |                |               |                    |         |
|-----------------------------|----------------|---------------|--------------------|---------|----------------|---------------|--------------------|---------|
| Coronary artery disease     | 20,856 (45.1%) | 2,170 (48.0%) | 1.24 (1.157-1.323) | <0.0001 | 19,901 (44.3%) | 3,125 (53.7%) | 2.06 (1.930-2.193) | <0.0001 |
| Hypertension                | 37,640 (81.4%) | 3,696 (81.8%) | 1.10 (1.010-1.197) | 0.03    | 36,904 (82.2%) | 4,432 (76.1%) | 0.90 (0.836-0.969) | 0.005   |
| Hyperlipidemia              | 19,722 (42.7%) | 2,038 (45.1%) | 1.08 (1.010-1.154) | 0.03    | 19,337 (43.1%) | 2,423 (41.6%) | 0.96 (0.898-1.020) | 0.18    |
| Diabetes                    | 20,187 (43.7%) | 2,204 (48.8%) | 1.06 (0.996-1.135) | 0.07    | 19,955 (44.4%) | 2,436 (41.9%) | 0.77 (0.723-0.819) | <0.0001 |
| Smoking                     | 4,456 (9.6%)   | 530 (11.7%)   | 1.07 (0.969-1.184) | 0.18    | 4,112 (9.2%)   | 874 (15.0%)   | 1.19 (1.088-1.294) | <0.0001 |
| Prior Stroke                | 4,684 (10.1%)  | 315 (7.0%)    | 0.76 (0.670-0.854) | <0.0001 | 4,665 (10.4%)  | 334 (5.7%)    | 0.71 (0.630-0.802) | <0.0001 |
| Peripheral arterial disease | 9,556 (20.7%)  | 786 (17.4%)   | 0.91 (0.838-0.991) | 0.03    | 9,502 (21.2%)  | 840 (14.4%)   | 0.87 (0.798-0.943) | 0.001   |
| Major arrhythmia            | 4,960 (10.7%)  | 461 (10.2%)   | 0.86 (0.770-0.950) | 0.003   | 4,583 (10.2%)  | 838 (14.4%)   | 1.03 (0.948-1.128) | 0.45    |
| Non-major arrhythmia        | 26,922 (58.3%) | 2,208 (48.8%) | 0.79 (0.740-0.842) | <0.0001 | 26,483 (59.0%) | 2,647 (45.5%) | 0.75 (0.706-0.797) | <0.0001 |
| Comorbid conditions         |                |               |                    |         |                |               |                    |         |
| Renal disease               | 22,105 (47.8%) | 2,017 (44.6%) | 0.87 (0.815-0.928) | <0.0001 | 22,122 (49.3%) | 2,000 (34.4%) | 0.59 (0.550-0.624) | <0.0001 |
| Chronic obstructive         |                |               |                    |         |                |               |                    |         |
| pulmonary disease           | 19,213 (41.6%) | 1,597 (35.3%) | 0.75 (0.702-0.801) | <0.0001 | 18,771 (41.8%) | 2,039 (35.0%) | 0.77 (0.727-0.823) | <0.0001 |
| Malignancy                  | 8,460 (18.3%)  | 745 (16.5%)   | 0.97 (0.890-1.053) | 0.45    | 8,408 (18.7%)  | 797 (13.7%)   | 0.87 (0.804-0.950) | 0.002   |
| Dementia                    | 3,070 (6.6%)   | 129 (2.9%)    | 0.60 (0.501-0.723) | <0.0001 | 3,129 (7.0%)   | 70 (1.2%)     | 0.37 (0.289-0.472) | <0.0001 |
